# Supplementary material
Source: publisher figshare collection journal article supplement (https://acs.figshare.com/ndownloader/files/5458331)
Supplement: Supplementary file 1 [file 5458331]

  
data_jr003 
  
_audit_creation_method            SHELXL-97 
_chemical_name_systematic 
; 
 ? 
; 
_chemical_name_common             ? 
_chemical_melting_point           ? 
_chemical_formula_moiety          ? 
_chemical_formula_sum 
 'C18 H21 N5 O6' 
_chemical_formula_weight          403.40
_chemical_absolute_configuration  'rm' 
  
loop_ 
 _atom_type_symbol 
 _atom_type_description 
 _atom_type_scat_dispersion_real 
 _atom_type_scat_dispersion_imag 
 _atom_type_scat_source 
 'C'  'C'   0.0033   0.0016 
 'International Tables Vol C Tables 4.2.6.8 and 6.1.1.4' 
 'H'  'H'   0.0000   0.0000 
 'International Tables Vol C Tables 4.2.6.8 and 6.1.1.4' 
 'N'  'N'   0.0061   0.0033 
 'International Tables Vol C Tables 4.2.6.8 and 6.1.1.4' 
 'O'  'O'   0.0106   0.0060 
 'International Tables Vol C Tables 4.2.6.8 and 6.1.1.4' 
  
_symmetry_cell_setting            Orthorhombic 
_symmetry_space_group_name_H-M    P2(1)2(1)2(1) 
  
loop_ 
 _symmetry_equiv_pos_as_xyz 
 'x, y, z' 
 '-x+1/2, -y, z+1/2' 
 '-x, y+1/2, -z+1/2' 
 'x+1/2, -y+1/2, -z' 
  
_cell_length_a                    7.4228(19) 
_cell_length_b                    11.744(3) 
_cell_length_c                    21.248(5) 
_cell_angle_alpha                 90.00 
_cell_angle_beta                  90.00 
_cell_angle_gamma                 90.00 
_cell_volume                      1852.3(8) 
_cell_formula_units_Z             4 
_cell_measurement_temperature     300(2) 
_cell_measurement_reflns_used     ? 
_cell_measurement_theta_min       ? 
_cell_measurement_theta_max       ? 
  
_exptl_crystal_description        'hexagonal prism' 
_exptl_crystal_colour             colorless 
_exptl_crystal_size_max           0.19 
_exptl_crystal_size_mid           0.04 
_exptl_crystal_size_min           0.04 
_exptl_crystal_density_meas       ? 
_exptl_crystal_density_diffrn     1.447 
_exptl_crystal_density_method     'not measured' 
_exptl_crystal_F_000              848 
_exptl_absorpt_coefficient_mu     0.111 
_exptl_absorpt_correction_type    none 
_exptl_absorpt_correction_T_min   ? 
_exptl_absorpt_correction_T_max   ? 
_exptl_absorpt_process_details    ? 
  
_exptl_special_details 
; 
 ? 
; 
  
_diffrn_ambient_temperature       300(2) 
_diffrn_radiation_wavelength      0.71073 
_diffrn_radiation_type            MoK\a 
_diffrn_radiation_source          'fine-focus sealed tube' 
_diffrn_radiation_monochromator   graphite 
_diffrn_measurement_device_type   'Bruker AXS SMART CCD 1K area detector' 
_diffrn_measurement_method        'phi and omega scans' 
_diffrn_detector_area_resol_mean  ? 
_diffrn_standards_number          ? 
_diffrn_standards_interval_count  ? 
_diffrn_standards_interval_time   ? 
_diffrn_standards_decay_%         ? 
_diffrn_reflns_number             11604 
_diffrn_reflns_av_R_equivalents   0.0988 
_diffrn_reflns_av_sigmaI/netI     0.1229 
_diffrn_reflns_limit_h_min        -9 
_diffrn_reflns_limit_h_max        9 
_diffrn_reflns_limit_k_min        -14 
_diffrn_reflns_limit_k_max        14 
_diffrn_reflns_limit_l_min        -27 
_diffrn_reflns_limit_l_max        25 
_diffrn_reflns_theta_min          1.92 
_diffrn_reflns_theta_max          28.01 
_reflns_number_total              4207 
_reflns_number_gt                 2281 
_reflns_threshold_expression      >2sigma(I) 
  
_computing_data_collection        'BRUKER SMART-NT V5.0' 
_computing_cell_refinement        'BRUKER SMART-NT V5.0' 
_computing_data_reduction         'BRUKER SAINT-NT V5/6.0' 
_computing_structure_solution     'SHELXS-97 (Sheldrick, 1990)' 
_computing_structure_refinement   'SHELXL-97 (Sheldrick, 1997)' 
_computing_molecular_graphics     'BRUKER SHELXTL-NT V5.1' 
_computing_publication_material   'BRUKER SHELXTL-NT V5.1' 
  
_refine_special_details 
; 
 Refinement of F^2^ against ALL reflections.  The weighted R-factor wR and 
 goodness of fit S are based on F^2^, conventional R-factors R are based 
 on F, with F set to zero for negative F^2^. The threshold expression of 
 F^2^ > 2sigma(F^2^) is used only for calculating R-factors(gt) etc. and is 
 not relevant to the choice of reflections for refinement.  R-factors based 
 on F^2^ are statistically about twice as large as those based on F, and R- 
 factors based on ALL data will be even larger. 
; 
  
_refine_ls_structure_factor_coef  Fsqd 
_refine_ls_matrix_type            full 
_refine_ls_weighting_scheme       calc 
_refine_ls_weighting_details 
 'calc w=1/[\s^2^(Fo^2^)+(0.0381P)^2^+0.1518P] where P=(Fo^2^+2Fc^2^)/3' 
_atom_sites_solution_primary      direct 
_atom_sites_solution_secondary    difmap 
_atom_sites_solution_hydrogens    geom 
_refine_ls_hydrogen_treatment     constr 
_refine_ls_extinction_method      none 
_refine_ls_extinction_coef        ? 
_refine_ls_abs_structure_details 
 'Flack H D (1983), Acta Cryst. A39, 876-881' 
_refine_ls_abs_structure_Flack    -4(2) 
_refine_ls_number_reflns          4207 
_refine_ls_number_parameters      277 
_refine_ls_number_restraints      0 
_refine_ls_R_factor_all           0.1814 
_refine_ls_R_factor_gt            0.0915 
_refine_ls_wR_factor_ref          0.1398 
_refine_ls_wR_factor_gt           0.1220 
_refine_ls_goodness_of_fit_ref    1.163 
_refine_ls_restrained_S_all       1.163 
_refine_ls_shift/su_max           0.000 
_refine_ls_shift/su_mean          0.000 
  
loop_ 
 _atom_site_label 
 _atom_site_type_symbol 
 _atom_site_fract_x 
 _atom_site_fract_y 
 _atom_site_fract_z 
 _atom_site_U_iso_or_equiv 
 _atom_site_adp_type 
 _atom_site_occupancy 
 _atom_site_symmetry_multiplicity 
 _atom_site_calc_flag 
 _atom_site_refinement_flags 
 _atom_site_disorder_assembly 
 _atom_site_disorder_group 
O1 O 1.0925(5) 0.0867(3) 0.26183(14) 0.0845(12) Uani 1 1 d . . . 
O2 O 1.0541(5) 0.3049(3) 0.71747(13) 0.0787(11) Uani 1 1 d . . . 
O3 O 1.0371(4) 0.4889(2) 0.42625(12) 0.0463(7) Uani 1 1 d . A . 
O4 O 0.7223(4) 0.5813(3) 0.34957(13) 0.0653(9) Uani 1 1 d . . . 
H4 H 0.7804 0.5889 0.3170 0.098 Uiso 1 1 calc R . . 
O5A O 1.3266(5) 0.6440(4) 0.4197(2) 0.0755(16) Uani 0.801(6) 1 d P A 1 
H5A H 1.3982 0.6874 0.4367 0.113 Uiso 0.801(6) 1 calc PR A 1 
O5B O 1.050(2) 0.7189(11) 0.4957(7) 0.060(6) Uani 0.199(6) 1 d P A 2 
H5B H 1.0380 0.6644 0.5194 0.090 Uiso 0.199(6) 1 calc PR A 2 
N1 N 0.9736(5) 0.2524(2) 0.57953(15) 0.0443(9) Uani 1 1 d . . . 
N2 N 1.0128(5) 0.4901(3) 0.69052(14) 0.0502(10) Uani 1 1 d . . . 
H2 H 1.0345 0.5098 0.7288 0.060 Uiso 1 1 calc R . . 
N3 N 0.9821(5) 0.6829(3) 0.67001(16) 0.0670(12) Uani 1 1 d . . . 
H1N3 H 0.9914 0.6899 0.7104 0.080 Uiso 1 1 d R . . 
H2N3 H 0.9997 0.7226 0.6365 0.080 Uiso 1 1 d R . . 
N4 N 0.9421(4) 0.5567(3) 0.58840(14) 0.0430(8) Uani 1 1 d . . . 
N5 N 0.9137(4) 0.3994(3) 0.51472(14) 0.0372(8) Uani 1 1 d . . . 
C1 C 1.0581(8) 0.2840(4) 0.2745(2) 0.0832(17) Uani 1 1 d . . . 
H1A H 1.0867 0.2852 0.2304 0.125 Uiso 1 1 calc R . . 
H1B H 1.1476 0.3261 0.2974 0.125 Uiso 1 1 calc R . . 
H1C H 0.9420 0.3181 0.2811 0.125 Uiso 1 1 calc R . . 
C2 C 1.0551(7) 0.1644(4) 0.2972(2) 0.0598(13) Uani 1 1 d . . . 
C3 C 0.9956(6) 0.1386(4) 0.36284(18) 0.0457(10) Uani 1 1 d . . . 
C4 C 0.9951(5) 0.2224(3) 0.40897(18) 0.0408(10) Uani 1 1 d . . . 
H4A H 1.0349 0.2954 0.3993 0.049 Uiso 1 1 calc R . . 
C5 C 0.9356(5) 0.1980(3) 0.46952(17) 0.0380(10) Uani 1 1 d . . . 
C6 C 0.8765(5) 0.0884(3) 0.48282(19) 0.0417(10) Uani 1 1 d . . . 
H6 H 0.8323 0.0714 0.5227 0.050 Uiso 1 1 calc R . . 
C7 C 0.8828(5) 0.0043(4) 0.4374(2) 0.0494(11) Uani 1 1 d . . . 
H7 H 0.8469 -0.0694 0.4473 0.059 Uiso 1 1 calc R . . 
C8 C 0.9418(6) 0.0290(4) 0.3777(2) 0.0513(11) Uani 1 1 d . . . 
H8 H 0.9456 -0.0279 0.3472 0.062 Uiso 1 1 calc R . . 
C9 C 0.9391(5) 0.2811(3) 0.52128(18) 0.0389(10) Uani 1 1 d . . . 
C10 C 0.9759(5) 0.3540(3) 0.61221(16) 0.0399(10) Uani 1 1 d . . . 
C11 C 1.0176(6) 0.3743(3) 0.67641(18) 0.0504(12) Uani 1 1 d . . . 
C12 C 0.9764(6) 0.5749(3) 0.64827(18) 0.0461(10) Uani 1 1 d . . . 
C13 C 0.9427(5) 0.4451(3) 0.57323(16) 0.0362(9) Uani 1 1 d . . . 
C14 C 0.8714(5) 0.4578(3) 0.45609(17) 0.0378(10) Uani 1 1 d . . . 
H14 H 0.8079 0.4042 0.4285 0.045 Uiso 1 1 calc R . . 
C15 C 0.7619(6) 0.5663(3) 0.45965(17) 0.0465(11) Uani 1 1 d . . . 
H15A H 0.6337 0.5504 0.4593 0.056 Uiso 1 1 calc R . . 
H15B H 0.7916 0.6101 0.4969 0.056 Uiso 1 1 calc R . . 
C16 C 0.8202(5) 0.6269(4) 0.40030(18) 0.0434(11) Uani 1 1 d . A . 
H16 H 0.8017 0.7093 0.4038 0.052 Uiso 1 1 calc R . . 
C17 C 1.0185(6) 0.5980(3) 0.39620(18) 0.0455(11) Uani 1 1 d . . . 
H17 H 1.0532 0.5913 0.3519 0.055 Uiso 1 1 calc R A 1 
C18A C 1.1467(14) 0.6844(13) 0.4296(8) 0.058(3) Uani 0.801(6) 1 d P A 1 
H18A H 1.1322 0.7599 0.4118 0.070 Uiso 0.801(6) 1 calc PR A 1 
H18B H 1.1200 0.6880 0.4742 0.070 Uiso 0.801(6) 1 calc PR A 1 
C18B C 1.104(8) 0.671(6) 0.422(4) 0.058(3) Uani 0.20 1 d P A 2 
H18C H 1.1027 0.7373 0.3948 0.070 Uiso 0.199(6) 1 calc PR A 2 
H18D H 1.2275 0.6450 0.4242 0.070 Uiso 0.199(6) 1 calc PR A 2 
O99 O 0.4290(4) 0.4500(3) 0.32674(16) 0.0890(12) Uani 1 1 d . . . 
H1O9 H 0.5327 0.4726 0.3299 0.133 Uiso 1 1 d R . . 
H2O9 H 0.4186 0.3837 0.3403 0.133 Uiso 1 1 d R . . 
  
loop_ 
 _atom_site_aniso_label 
 _atom_site_aniso_U_11 
 _atom_site_aniso_U_22 
 _atom_site_aniso_U_33 
 _atom_site_aniso_U_23 
 _atom_site_aniso_U_13 
 _atom_site_aniso_U_12 
O1 0.115(3) 0.085(2) 0.053(2) -0.023(2) 0.016(2) 0.007(2) 
O2 0.132(3) 0.065(2) 0.0392(17) 0.0187(16) -0.006(2) 0.002(2) 
O3 0.0468(17) 0.0383(15) 0.0538(17) 0.0146(13) 0.0118(14) 0.0039(14) 
O4 0.064(2) 0.088(2) 0.0445(17) 0.0124(19) -0.0118(16) -0.019(2) 
O5A 0.042(2) 0.069(3) 0.116(4) 0.021(3) -0.017(2) -0.013(2) 
O5B 0.089(13) 0.038(9) 0.053(10) -0.003(7) -0.015(9) -0.012(8) 
N1 0.052(2) 0.0381(19) 0.043(2) 0.0061(17) 0.0027(18) -0.0020(18) 
N2 0.070(3) 0.054(2) 0.0265(17) 0.0018(16) 0.0002(18) 0.002(2) 
N3 0.106(3) 0.052(2) 0.043(2) -0.0100(18) -0.005(2) -0.001(3) 
N4 0.057(2) 0.038(2) 0.0338(18) -0.0021(15) 0.0019(17) 0.0025(18) 
N5 0.046(2) 0.0334(18) 0.0326(17) 0.0029(15) 0.0013(15) -0.0023(16) 
C1 0.120(5) 0.080(4) 0.050(3) 0.007(3) 0.012(3) -0.015(4) 
C2 0.066(3) 0.069(3) 0.045(3) -0.009(3) 0.000(2) -0.004(3) 
C3 0.045(3) 0.045(2) 0.048(2) -0.006(2) -0.003(2) 0.004(2) 
C4 0.044(2) 0.033(2) 0.046(2) 0.0016(19) 0.000(2) -0.001(2) 
C5 0.035(2) 0.037(2) 0.042(2) 0.0018(19) -0.002(2) 0.000(2) 
C6 0.043(2) 0.037(2) 0.046(2) 0.009(2) 0.0043(19) 0.004(2) 
C7 0.053(3) 0.033(2) 0.063(3) -0.001(2) -0.005(2) -0.008(2) 
C8 0.056(3) 0.044(3) 0.054(3) -0.011(2) -0.011(2) 0.004(2) 
C9 0.042(2) 0.037(2) 0.039(2) 0.0044(19) 0.006(2) -0.002(2) 
C10 0.049(3) 0.038(2) 0.032(2) 0.0069(19) 0.0034(19) 0.001(2) 
C11 0.064(3) 0.049(3) 0.038(2) 0.012(2) 0.009(2) -0.001(3) 
C12 0.053(3) 0.047(3) 0.039(2) 0.001(2) 0.006(2) -0.005(2) 
C13 0.042(2) 0.038(2) 0.029(2) 0.0016(19) 0.0015(18) 0.001(2) 
C14 0.043(2) 0.038(2) 0.032(2) 0.0063(18) -0.0002(18) -0.002(2) 
C15 0.044(2) 0.050(3) 0.046(2) 0.005(2) 0.000(2) 0.012(2) 
C16 0.048(3) 0.040(3) 0.043(2) 0.008(2) -0.004(2) 0.003(2) 
C17 0.054(3) 0.038(2) 0.044(2) 0.009(2) 0.001(2) -0.001(2) 
C18A 0.042(7) 0.042(5) 0.090(6) 0.011(4) -0.022(5) -0.012(4) 
C18B 0.042(7) 0.042(5) 0.090(6) 0.011(4) -0.022(5) -0.012(4) 
O99 0.081(3) 0.067(2) 0.119(3) 0.028(2) -0.013(2) -0.017(2) 
  
_geom_special_details 
; 
 All esds (except the esd in the dihedral angle between two l.s. planes) 
 are estimated using the full covariance matrix.  The cell esds are taken 
 into account individually in the estimation of esds in distances, angles 
 and torsion angles; correlations between esds in cell parameters are only 
 used when they are defined by crystal symmetry.  An approximate (isotropic) 
 treatment of cell esds is used for estimating esds involving l.s. planes. 
; 
  
loop_ 
 _geom_bond_atom_site_label_1 
 _geom_bond_atom_site_label_2 
 _geom_bond_distance 
 _geom_bond_site_symmetry_2 
 _geom_bond_publ_flag 
O1 C2 1.214(5) . ? 
O2 C11 1.224(4) . ? 
O3 C14 1.431(4) . ? 
O3 C17 1.439(4) . ? 
O4 C16 1.406(5) . ? 
O5A C18A 1.433(15) . ? 
O5B C18B 1.70(8) . ? 
N1 C9 1.308(5) . ? 
N1 C10 1.381(5) . ? 
N2 C12 1.368(5) . ? 
N2 C11 1.393(5) . ? 
N3 C12 1.351(5) . ? 
N4 C12 1.315(4) . ? 
N4 C13 1.351(5) . ? 
N5 C13 1.371(4) . ? 
N5 C9 1.408(4) . ? 
N5 C14 1.457(4) . ? 
C1 C2 1.485(6) . ? 
C2 C3 1.495(6) . ? 
C3 C8 1.384(5) . ? 
C3 C4 1.389(5) . ? 
C4 C5 1.390(5) . ? 
C5 C6 1.389(5) . ? 
C5 C9 1.471(5) . ? 
C6 C7 1.382(5) . ? 
C7 C8 1.374(6) . ? 
C10 C13 1.374(5) . ? 
C10 C11 1.419(5) . ? 
C14 C15 1.513(5) . ? 
C15 C16 1.512(5) . ? 
C16 C17 1.513(6) . ? 
C17 C18B 1.20(6) . ? 
C17 C18A 1.562(11) . ? 
  
loop_ 
 _geom_angle_atom_site_label_1 
 _geom_angle_atom_site_label_2 
 _geom_angle_atom_site_label_3 
 _geom_angle 
 _geom_angle_site_symmetry_1 
 _geom_angle_site_symmetry_3 
 _geom_angle_publ_flag 
C14 O3 C17 110.0(3) . . ? 
C9 N1 C10 104.8(3) . . ? 
C12 N2 C11 125.1(3) . . ? 
C12 N4 C13 112.8(3) . . ? 
C13 N5 C9 106.0(3) . . ? 
C13 N5 C14 128.7(3) . . ? 
C9 N5 C14 125.3(3) . . ? 
O1 C2 C1 120.5(4) . . ? 
O1 C2 C3 119.5(4) . . ? 
C1 C2 C3 119.9(4) . . ? 
C8 C3 C4 119.9(4) . . ? 
C8 C3 C2 119.1(4) . . ? 
C4 C3 C2 121.1(4) . . ? 
C3 C4 C5 120.5(4) . . ? 
C6 C5 C4 118.7(4) . . ? 
C6 C5 C9 118.0(3) . . ? 
C4 C5 C9 123.3(3) . . ? 
C7 C6 C5 120.6(4) . . ? 
C8 C7 C6 120.4(4) . . ? 
C7 C8 C3 119.9(4) . . ? 
N1 C9 N5 112.0(3) . . ? 
N1 C9 C5 122.6(3) . . ? 
N5 C9 C5 125.3(3) . . ? 
C13 C10 N1 111.5(3) . . ? 
C13 C10 C11 119.2(4) . . ? 
N1 C10 C11 129.1(3) . . ? 
O2 C11 N2 120.2(4) . . ? 
O2 C11 C10 128.4(4) . . ? 
N2 C11 C10 111.4(3) . . ? 
N4 C12 N3 119.3(4) . . ? 
N4 C12 N2 123.7(4) . . ? 
N3 C12 N2 117.0(4) . . ? 
N4 C13 N5 126.6(3) . . ? 
N4 C13 C10 127.7(3) . . ? 
N5 C13 C10 105.7(3) . . ? 
O3 C14 N5 108.3(3) . . ? 
O3 C14 C15 105.6(3) . . ? 
N5 C14 C15 118.0(3) . . ? 
C16 C15 C14 101.6(3) . . ? 
O4 C16 C15 108.2(3) . . ? 
O4 C16 C17 111.9(3) . . ? 
C15 C16 C17 102.7(3) . . ? 
C18B C17 O3 112(4) . . ? 
C18B C17 C16 109(4) . . ? 
O3 C17 C16 105.5(3) . . ? 
C18B C17 C18A 6(4) . . ? 
O3 C17 C18A 108.6(6) . . ? 
C16 C17 C18A 114.9(7) . . ? 
O5A C18A C17 106.6(10) . . ? 
C17 C18B O5B 122(5) . . ? 
  
_diffrn_measured_fraction_theta_max    0.965 
_diffrn_reflns_theta_full              28.01 
_diffrn_measured_fraction_theta_full   0.965 
_refine_diff_density_max    0.210 
_refine_diff_density_min   -0.207 
_refine_diff_density_rms    0.045 
  
